# Supplementary material for: Facile fabrication and optoelectronic properties of platinum octaethylporphyrin microsheets
Source: Royal Society of Chemistry journal article supplement (doi:10.1039/c4ra07601j), 2014-01-01
Supplement: c4ra07601j1.pdf [file c4ra07601j1.pdf]

Supporting Information:

**Facile fabrication and optoelectronic properties of platinum  
octaethylporphyrin microsheets**

Qing-Guo Zhang,<sup>a</sup> Ying Lu<sup>a,b</sup>, Feng-Xia Wang<sup>b</sup>, Ying Wei<sup>\*a</sup>, Yong-Qiang Liu<sup>b</sup>, Bo Yang<sup>b</sup> and Ge-Bo Pan<sup>\*b</sup>

<sup>a</sup>*Department of Chemistry, Bohai University, 121000 Jinzhou, P. R. China.*

<sup>b</sup>*Suzhou Institute of Nano-tech and Nano-bionics, Chinese Academy of Sciences, 215123 Suzhou, P. R. China.*

*\*Corresponding author. weiyang2001\_77@163.com, gbpan2008@sinano.ac.cn.*

**Experimental section**

In a typical experiment, PtOEP powder (99%, Aldrich) was dissolved in Chloroform at a concentration of 2 mg/ml. The PtOEP chloroform solution was slowly injected into propylene glycol methyl ether acetate (PGMEA). The volume ratio of  $V_{\text{chloroform}}/V_{\text{PGMEA}}$  was 3:1. A drop of PtOEP solution was then directly dropped onto the heavily-doped clean Si substrate. After the solvent evaporation, the microsheets of PtOEP were formed. To remove the solvent thoroughly, the microsheets were post-annealed at 150 °C for 30 min. The morphology and crystalline structures were then characterized by scanning electron microscopy (SEM, Quanta 400 FEG), transmission electron microscopy (TEM, Tecnai G2 20 S-Twin), X-ray diffraction (XRD, Bruker D8 Advance X-Ray Diffractometer), Fourier-transform infrared (FTIR, Thermo Fisher Scientific FTIR 6700), atomic force microscope (Veeco), confocal laser Raman microscope (JY HR800), and fluorescence microscope (Leica DM 4000M).

The photodetectors were constructed in bottom-connected configuration. The finger

electrodes with the length of 200  $\mu\text{m}$ , the width of 10  $\mu\text{m}$  and the distance of 10  $\mu\text{m}$ , were fabricated by the photolithography and electron beam deposition of Au on the  $\text{SiO}_2/\text{Si}$  substrate. The 5  $\mu\text{l}$  PtOEP solution (0.5 mg/ml, the mixed solvent volume ratio of  $V_{\text{chloroform}}:V_{\text{PGMEA}}$  was 3:1 ) was directly deposited on 5mm $\times$ 5mm the Au electrodes deposited  $\text{SiO}_2/\text{Si}$  substrate. The solvent was allowed to evaporate in air. To remove the solvent thoroughly and enhance the contact the nanowire and the Au electrodes, the device was also post-annealed at 150  $^\circ\text{C}$  for 30 min. Current-voltage characteristics of the devices were recorded with Keithley 4200 SCS and RF Probe Station (PE-4RF) probe station in a clean and shielded box at room temperature. A Xenon lamp was used as the white light source with different intensity. All measurements were carried out at ambient conditions.

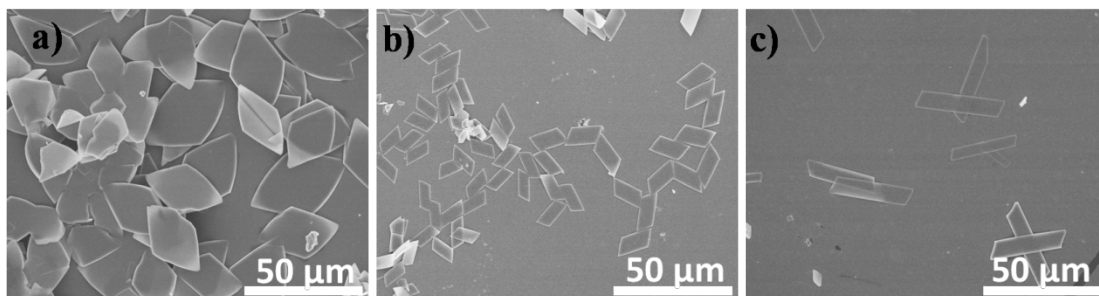

**Figure S1.** SEM images of PtOEP microsheets fabricated by using different volume ratio of chloroform solution and PGMEA: (a) 5:1; (b) 3:1, (c) 1:1;

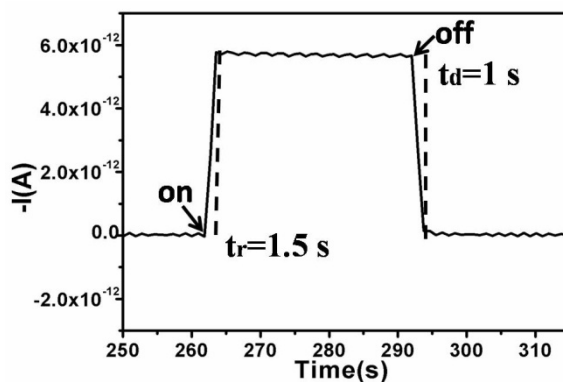

**Figure S2.** The rise time ( $t_r$ ) and the decay time ( $t_d$ ) of the device based on PtOEP microsheet.
